# Supplementary material for: Analogs of Natural 3-Deoxyanthocyanins: O-Glucosides of the 4′,7-Dihydroxyflavylium Ion and the Deep Influence of Glycosidation on Color
Source: MDPI journal article supplement (doi:10.3390/ijms17101751), 2016-10-20
Supplement: s1 [file s1]

# Supplementary Materials: Analogs of Natural 3-Deoxyanthocyanins: O-Glucosides of the 4',7-Dihydroxyflavylium Ion and the Deep Influence of Glycosidation on Color

Nuno Basílio, Sheiraz Al Bittar, Nathalie Mora, Olivier Dangles and Fernando Pina

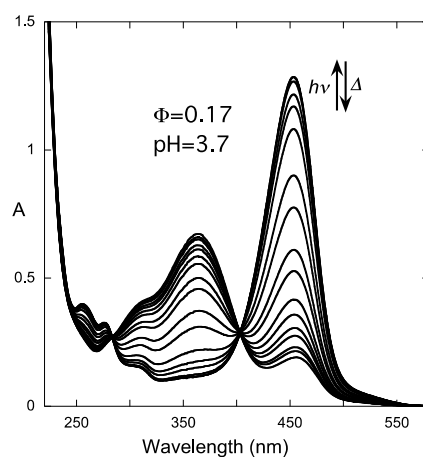

**Figure S1.** Spectral variations of P3 upon irradiation at 365 nm of an equilibrated solution at pH = 3.7.

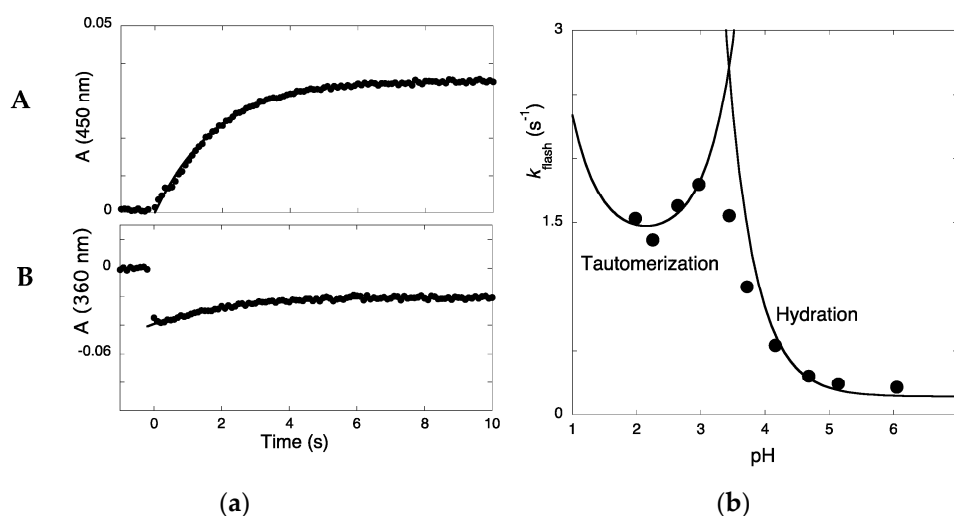

**Figure S2.** (a) Spectral changes observed at 450 nm (A) and 360 nm (B) after flash photolysis of P5 at pH = 4.2; (b) pH-dependence of the apparent first-order rate constants and its fitting according to Equation s (15) and (16):  $k_i K_t / (1 + K_t) = 0.15 \text{ s}^{-1}$ ;  $k_{-t} / (1 + K_t) = 9 \times 10^3 \text{ M}^{-1} \cdot \text{s}^{-1}$ ,  $k_h = 0.05 \text{ s}^{-1}$ ;  $\text{p}K_a = 3.7$ ;  $k_i + k_{-t} = 1.35 \text{ s}^{-1}$ ;  $K_a$  set at  $10^{-3.7}$ .
